# Supplementary material for: Evaluation of Acute and Subacute Toxicity and LC-MS/MS Compositional Alkaloid Determination of the Hydroethanolic Extract of Dysphania ambrosioides (L.) Mosyakin and Clemants Flowers
Source: MDPI journal article supplement (doi:10.3390/toxins14070475), 2022-07-12

Supplementary file

# Evaluation of Acute and Subacute Toxicity and LC-MS/MS Compositional Alkaloids Determination of the Hydroethanolic Extract of *Dysphania ambrosioides* (L.) Mosyakin and Clemants Flowers

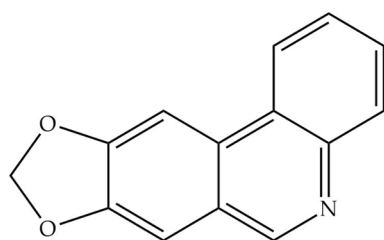

Compound CID : 443684  
Compound number : 1  
Trisphaeridine

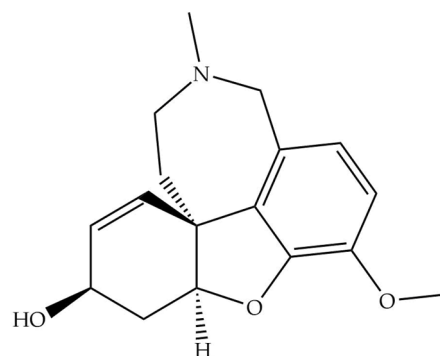

Compound CID : 9651  
Compound number : 2  
Galanthamine

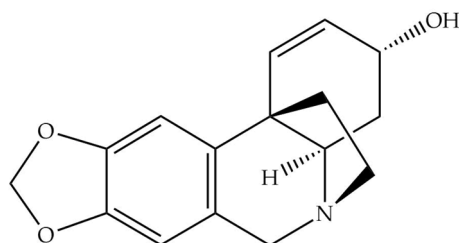

Compound CID : 398937  
Compound number : 3  
Crinine

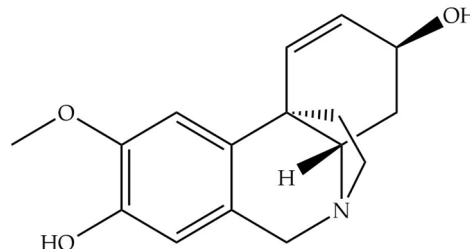

Compound CID : 443683  
Compound number : 4  
Demethylmaritidine

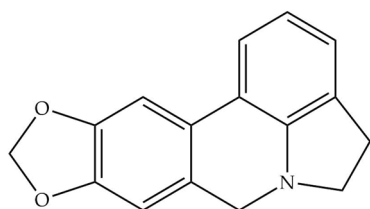

Compound CID : 619567  
Compound number : 5  
Anhydrolycorine

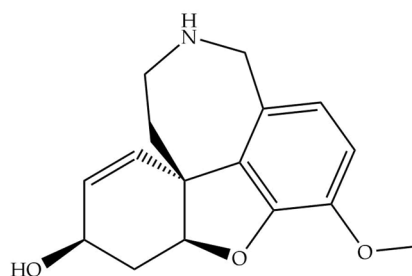

Compound CID: 9838394  
Compound number : 6  
Norgalanthamine

**Figure S1.** Identified alkaloids found in *D. ambrosioides*' flowers hydroethanolic extract, along with their compound CID (retrieved from PubChem on May 10, 2022).

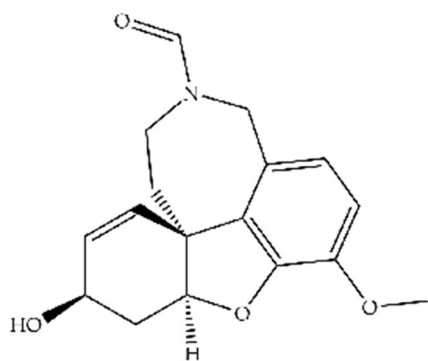

**Compound CID : 22899516**  
**Compound number : 7**  
**N-formylgalanthamine**

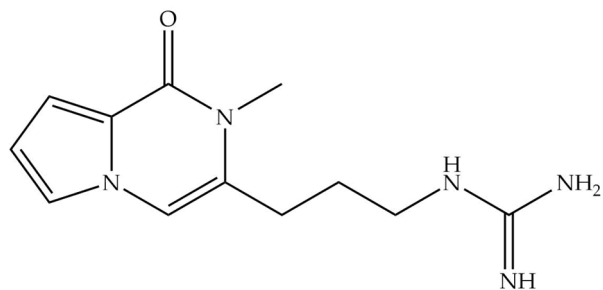

**Compound CID : 114748**  
**Compound number : 8**  
**Peramine**

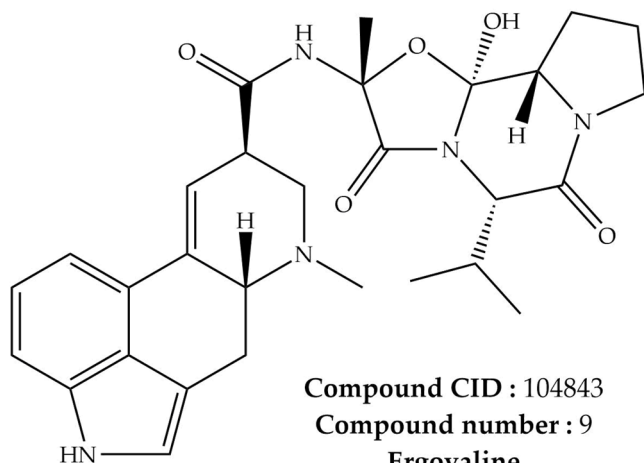

**Compound CID : 104843**  
**Compound number : 9**  
**Ergovaline**

**Figure S1. Cont.**

**Table S1.** Screening of alkaloids from *D. ambrosioides* hydroethanolic extract, and standards molecules using LC-MS/MS.

| Compound        | [M-H] <sup>+</sup> literature                                                       | Selected m/z                                                                          |
|-----------------|-------------------------------------------------------------------------------------|---------------------------------------------------------------------------------------|
| Ergovaline      | 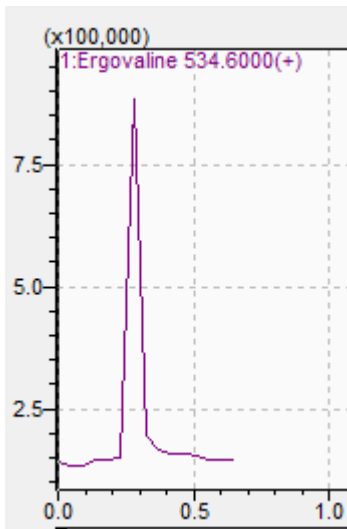   |    |
|                 |                                                                                     |                                                                                       |
| Galanthamine    |   |   |
|                 |                                                                                     |                                                                                       |
| Norgalanthamine |  |  |
|                 |                                                                                     |                                                                                       |

Anhydrolycorine

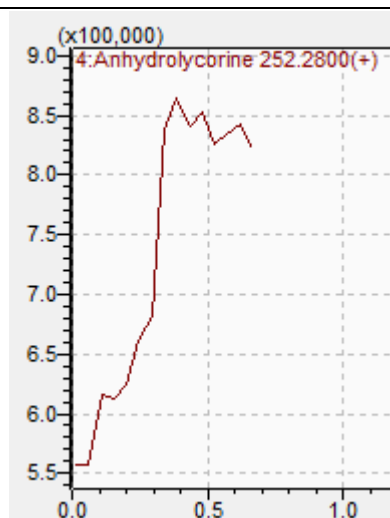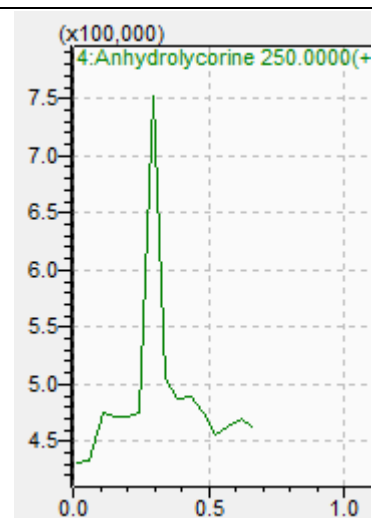

Trisphaeridine

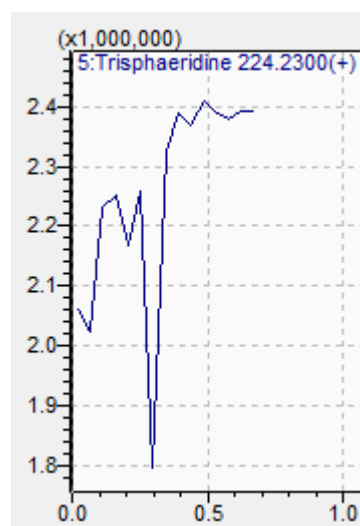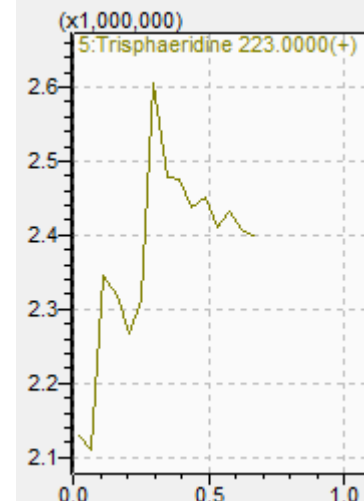

Crinine

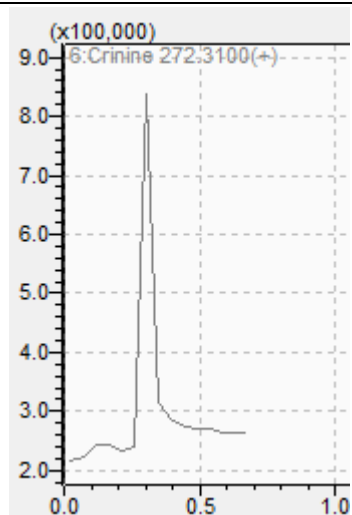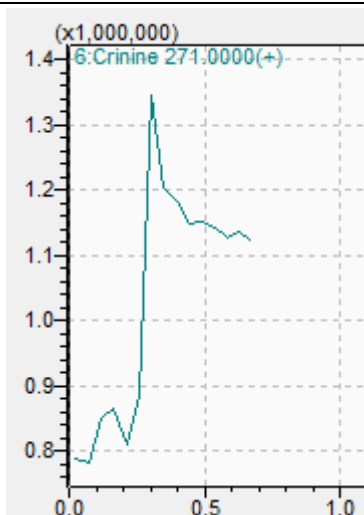

## Demethylmaritidine

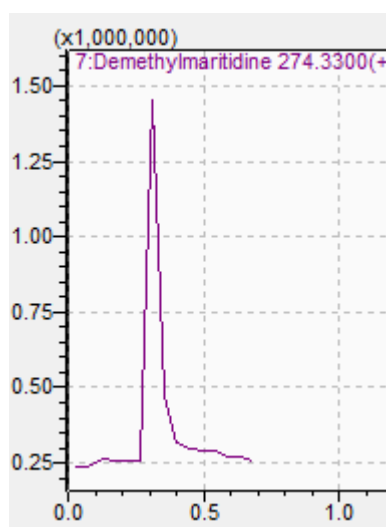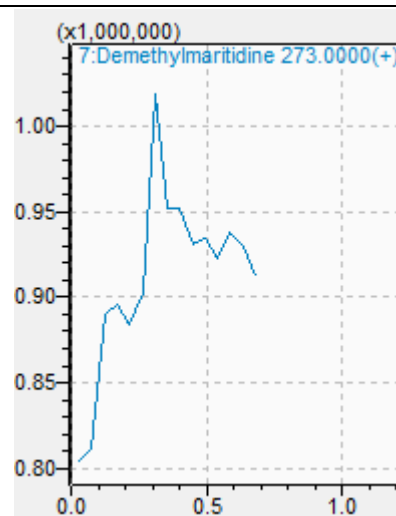

## N-formylnorgalanthamine

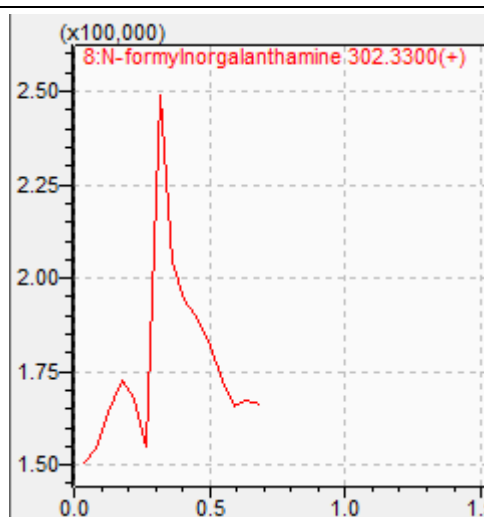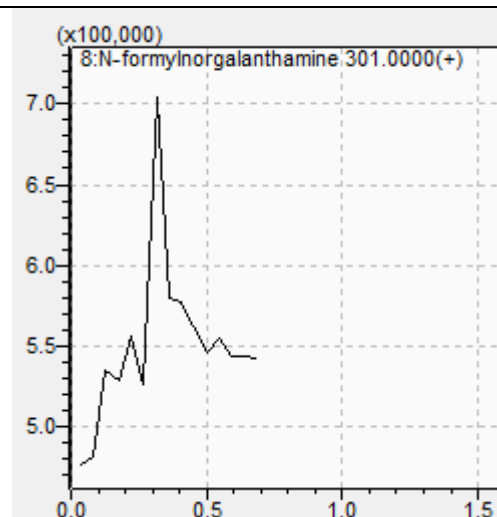

## Peramine

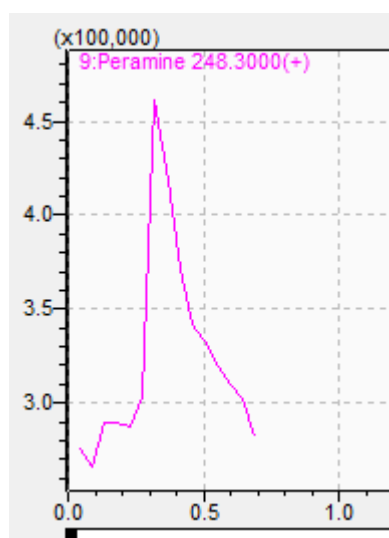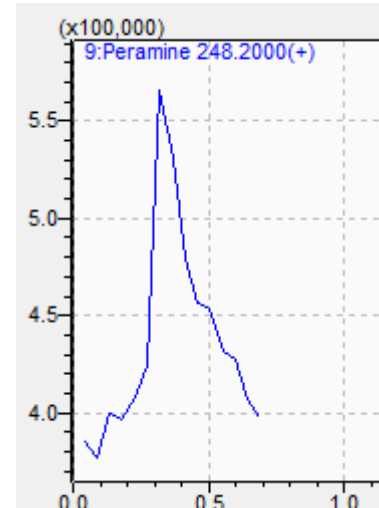

Supplement: s1 [file s1]
